# Supplementary material for: What regulates the catalytic activities in AGE catalysis? An answer from quantum mechanics/molecular mechanics simulations
Source: Royal Society of Chemistry journal article supplement (doi:10.1039/c7cp07079a), 2017-01-01
Supplement: c7cp07079a1.pdf [file c7cp07079a1.pdf]

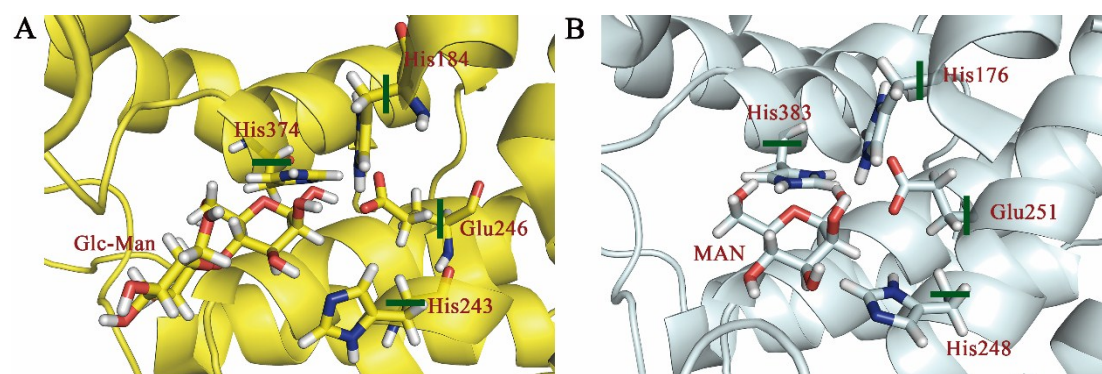

**Fig. S1** The QM regions for *RaCE* and *SeYihS*. (A) The QM regions for *RaCE* included the substrate (4-*O*- $\beta$ -D-glucosyl-D-mannose), the side chain of residue His184, His243, Glu246 and His374. (B) The QM regions for *SeYihS* included the substrate (D-mannose), residue His176, His248, Glu251 and His383

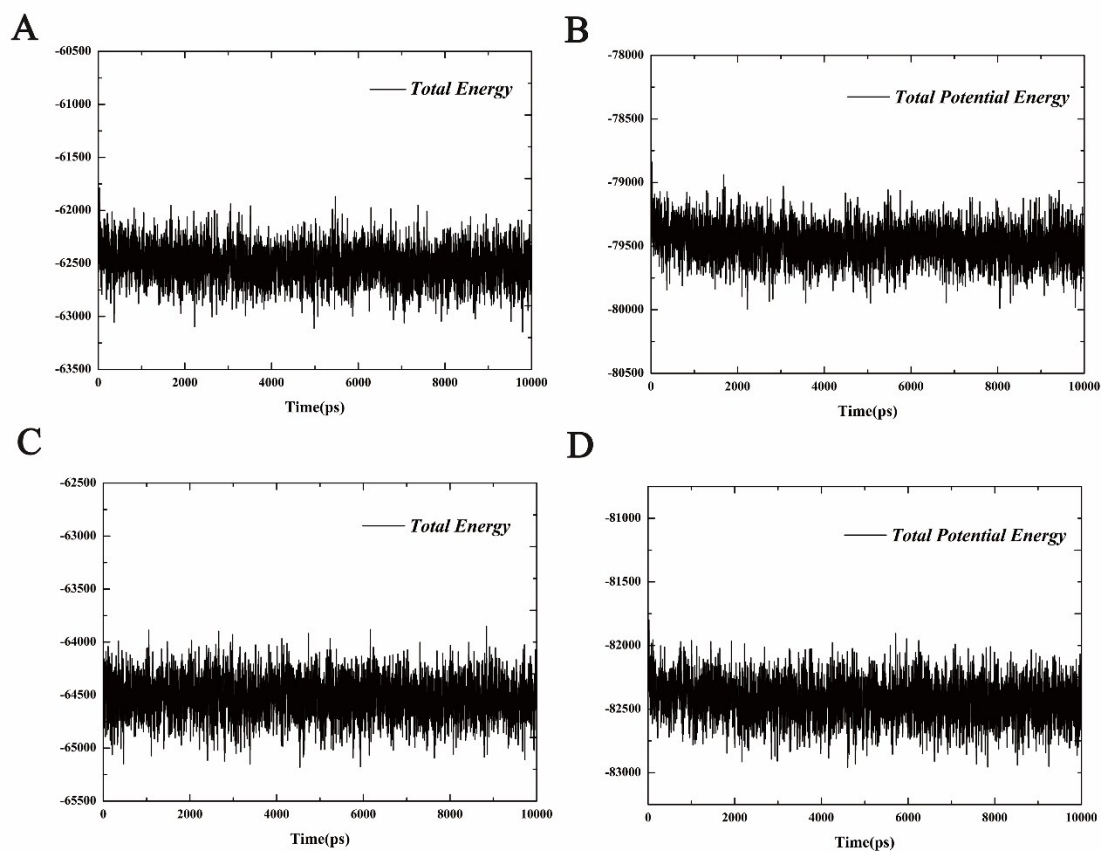

**Fig. S2** Total potential energy and total energy results of *RaCE* and *SeYihS*. (A) The total energy curve of the *RaCE*/Glc-Man complex. (B) The total potential energy curve of the *RaCE*/Glc-Man complex. (C) The total energy curve of the *SeYihS*/MAN complex. (D) The total potential energy curve of the *SeYihS*/MAN complex.

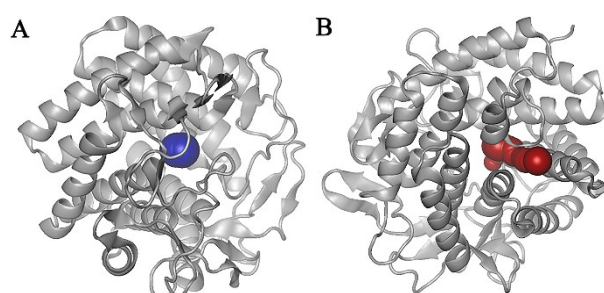

**Fig. S3** The substrate access channel analysis. (A) for the *RaCE*/Glc-Man, and (B) for *SeYihS*/MAN complex.

**Table S1.** The average distances between catalytic residues and the substrate.

| The average distances for <i>RaCE</i> (Å) |      | The average distances for <i>SeYihS</i> (Å) |                     |
|-------------------------------------------|------|---------------------------------------------|---------------------|
| HE2@His374 - O5@Glc-Man                   | 2.00 | 2.10                                        | HE2@His383 - O5@MAN |
| NE2@His374 - H@Glc-Man                    | 3.48 | 3.79                                        | NE2@His383 - H@MAN  |
| OE1@Glu246 - H@Glc-Man                    | 1.76 | 1.77                                        | OE1@Glu251 - H@MAN  |
| OE2@Glu246 - H@Glc-Man                    | 2.44 | 2.68                                        | OE2@Glu251 - H@MAN  |
| NE2@His243 - H2@Glc-Man                   | 3.05 | 4.31                                        | NE2@His248 - H2@MAN |
